# Supplementary material for: Variability in protein cargo detection in technical and biological replicates of exosome-enriched extracellular vesicles
Source: PLoS One. 2020 Mar 2;15(3):e0228871. doi: 10.1371/journal.pone.0228871 (PMC7051218; doi:10.1371/journal.pone.0228871)
Supplement: S4 Table — Protein names represented in Figs 7–9 are given here. (XLS) [file pone.0228871.s008.xls]

## Sheet: H1993
	Technical replicates										Biological replicates
	TR1			TR2			TR3				BR1			BR2			BR3
	R1	R2	R3	R4	R5	R6	R7	R8	R9		R1	R4	R7	R2	R5	R8	R3	R6	R9
Histone H4	5.23551e+06	1.0937e+07	4.93029e+06	3.70123e+06	2.91855e+06	3.49578e+06	1.1729e+06	1.01596e+06	1.39847e+06		5.23551e+06	3.70123e+06	1.1729e+06	1.0937e+07	2.91855e+06	1.01596e+06	4.93029e+06	3.49578e+06	1.39847e+06
Adenosylhomocysteinase	3.24103e+06	3.96617e+06	2.98304e+06	1.59383e+06	1.22886e+06	1.0652e+06	390369	349407	442262		3.24103e+06	1.59383e+06	390369	3.96617e+06	1.22886e+06	349407	2.98304e+06	1.0652e+06	442262
Elongation factor 2	2.61776e+06	3.34049e+06	2.61016e+06	1.3379e+06	1.5473e+06	1.46315e+06	381137	401649	366625		2.61776e+06	1.3379e+06	381137	3.34049e+06	1.5473e+06	401649	2.61016e+06	1.46315e+06	366625
Phosphoglycerate kinase 1	1.8906e+06	1.68262e+06	1.5951e+06	1.6314e+06	1.76882e+06	1.89564e+06	444848	517621	519732		1.8906e+06	1.6314e+06	444848	1.68262e+06	1.76882e+06	517621	1.5951e+06	1.89564e+06	519732
Proteasome subunit beta type-1	2.4931e+06	1.8028e+06	1.49152e+06	1.31664e+06	1.18434e+06	1.75989e+06	468190	301725	238692		2.4931e+06	1.31664e+06	468190	1.8028e+06	1.18434e+06	301725	1.49152e+06	1.75989e+06	238692
Proteasome subunit alpha type-5	2.0942e+06	2.27153e+06	1.56609e+06	1.12158e+06	648567	1.22659e+06	415272	334527	330802		2.0942e+06	1.12158e+06	415272	2.27153e+06	648567	334527	1.56609e+06	1.22659e+06	330802
Collagen alpha-1(II) chain	1.58283e+06	1.58479e+06	971221	928208	1.47605e+06	1.52266e+06	282889	397337	332821		1.58283e+06	928208	282889	1.58479e+06	1.47605e+06	397337	971221	1.52266e+06	332821
Laminin subunit gamma-1	1.35754e+06	1.58935e+06	1.35359e+06	972040	951232	1.06304e+06	150986	170280	173195		1.35754e+06	972040	150986	1.58935e+06	951232	170280	1.35359e+06	1.06304e+06	173195
Protein disulfide-isomerase A3	294958	746513	441153	1.05618e+06	1.60321e+06	1.73259e+06	505200	520921	618146		294958	1.05618e+06	505200	746513	1.60321e+06	520921	441153	1.73259e+06	618146
Collagen alpha-1(I) chain	924211	1.78217e+06	1.07512e+06	1.12158e+06	1.29713e+06	919942	91924.7	123418	146453		924211	1.12158e+06	91924.7	1.78217e+06	1.29713e+06	123418	1.07512e+06	919942	146453
T-complex protein 1 subunit zeta	897724	865546	969711	792056	916029	1.15495e+06	507329	523117	620751		897724	792056	507329	865546	916029	523117	969711	1.15495e+06	620751
Laminin subunit alpha-5	1.19002e+06	1.75929e+06	1.3975e+06	631096	586112	575151	123082	141014	146416		1.19002e+06	631096	123082	1.75929e+06	586112	141014	1.3975e+06	575151	146416
Cathepsin L2	1.53986e+06	1.3362e+06	921232	747723	648567	817726	168047	144397	85673.8		1.53986e+06	747723	168047	1.3362e+06	648567	144397	921232	817726	85673.8
Heat shock protein HSP 90-beta	631232	483305	518329	1.2988e+06	1.02415e+06	1.16214e+06	410653	425866	433157		631232	1.2988e+06	410653	483305	1.02415e+06	425866	518329	1.16214e+06	433157
Protein disulfide-isomerase A6	722140	783287	1.26008e+06	738718	664488	987407	286901	423713	319960		722140	738718	286901	783287	664488	423713	1.26008e+06	987407	319960
Histone H3.2	199249	360561	198670	182144	153202	144871	1.31805e+06	1.1011e+06	1.39994e+06		199249	182144	1.31805e+06	360561	153202	1.1011e+06	198670	144871	1.39994e+06
26S proteasome regulatory subunit 6B	285573	550674	284744	769198	889592	841211	230484	220052	293763		285573	769198	230484	550674	889592	220052	284744	841211	293763
Elongation factor 1-gamma	722140	522191	720043	897740	389345	368171	151441	271100	321698		722140	897740	151441	522191	389345	271100	720043	368171	321698
Chloride intracellular channel protein 1	844437	732752	841986	305887	283011	334524	290812	242944	288286		844437	305887	290812	732752	283011	242944	841986	334524	288286
T-complex protein 1 subunit delta	246964	357168	221623	717079	829316	542917	326702	332436	306819		246964	717079	326702	357168	829316	332436	221623	542917	306819
Histone H3.3	117681	226926	130508	112046	103667	98029	755224	878771	1.20321e+06		117681	112046	755224	226926	103667	878771	130508	98029	1.20321e+06
Cell division control protein 42 homolog	654439	945525	652539	132471	91922.9	144873	343022	210534	374741		654439	132471	343022	945525	91922.9	210534	652539	144873	374741
Talin-1	450203	578754	415644	395859	371978	378805	200753	242106	260359		450203	395859	200753	578754	371978	242106	415644	378805	260359
Peroxiredoxin-6	638557	369401	254681	395853	686718	541142	143933	30888.2	110070		638557	395853	143933	369401	686718	30888.2	254681	541142	110070
78 kDa glucose-regulated protein	430785	479243	396494	124115	159491	180980	346046	468643	460229		430785	124115	346046	479243	159491	468643	396494	180980	460229
Thrombospondin-1	443878	361098	313501	245253	262630	278148	268844	250260	262702		443878	245253	268844	361098	262630	250260	313501	278148	262702
Peptidyl-prolyl cis-trans isomerase A	99676.1	145465	250977	288408	148244	210273	278097	522724	708896		99676.1	288408	278097	145465	148244	522724	250977	210273	708896
Keratin	60178.3	261096	150009	93389.1	76239.7	96124.5	591348	571641	577838		60178.3	93389.1	591348	261096	76239.7	571641	150009	96124.5	577838
Galectin-3-binding protein	252752	243692	180013	273396	279705	229994	317364	371864	312565		252752	273396	317364	243692	279705	371864	180013	229994	312565
Annexin A2	134133	125153	112172	89682.5	103720	112609	540765	562090	644765		134133	89682.5	540765	125153	103720	562090	112172	112609	644765
Alpha-enolase	144983	186382	240937	95651	132747	97632.3	536985	419466	559974		144983	95651	536985	186382	132747	419466	240937	97632.3	559974
Keratin	143570	83054.2	104979	104778	130499	141030	506302	563951	525805		143570	104778	506302	83054.2	130499	563951	104979	141030	525805
Tubulin beta chain	92391.4	120258	85981.6	56898.2	59821.7	62225.1	549233	602473	655342		92391.4	56898.2	549233	120258	59821.7	602473	85981.6	62225.1	655342
Proteasome subunit alpha type-3	120093	49623.7	136851	131676	114214	144004	604727	499636	474310		120093	131676	604727	49623.7	114214	499636	136851	144004	474310
Vacuolar protein sorting-associated protein 35	337806	244273	168413	448689	518918	327131	74837.7	40190.9	63589.5		337806	448689	74837.7	244273	518918	40190.9	168413	327131	63589.5
Pyruvate kinase PKM	94674.2	94428.3	94399.4	70099	77546.1	79995	532597	533050	617110		94674.2	70099	532597	94428.3	77546.1	533050	94399.4	79995	617110
Endoplasmin	183702	199257	206065	240340	277957	292045	229777	246800	256255		183702	240340	229777	199257	277957	246800	206065	292045	256255
Proteasome subunit alpha type-1	51667.1	99630.3	103034	66300.6	57508.4	66465.4	512576	668524	466645		51667.1	66300.6	512576	99630.3	57508.4	668524	103034	66465.4	466645
Proteasome subunit alpha type-7	76617.3	73871	67906.5	115741	105173	126577	575533	475515	451412		76617.3	115741	575533	73871	105173	475515	67906.5	126577	451412
Proteasome subunit alpha type-2	65313.4	113350	52099	74438	105220	108543	680318	393463	466899		65313.4	74438	680318	113350	105220	393463	52099	108543	466899
Heat shock 70 kDa protein 1B	70342.8	58132.6	65128.7	61638.8	58706.5	67409.6	492172	528634	647533		70342.8	61638.8	492172	58132.6	58706.5	528634	65128.7	67409.6	647533
Heat shock 70 kDa protein 1A	70342.8	58132.6	65128.7	61638.8	58706.5	67409.6	492172	528634	647533		70342.8	61638.8	492172	58132.6	58706.5	528634	65128.7	67409.6	647533
Heat shock cognate 71 kDa protein	95191.1	86042.9	87005.2	69640.9	76302.1	72152.3	473359	521806	555688		95191.1	69640.9	473359	86042.9	76302.1	521806	87005.2	72152.3	555688
Tubulin alpha-4A chain	92646.7	89325.9	92377.7	72672.9	75642.9	75502.8	422543	488758	621406		92646.7	72672.9	422543	89325.9	75642.9	488758	92377.7	75502.8	621406
Fibulin-1	226774	242411	235946	77024.5	70326.6	70935.3	278156	369060	354523		226774	77024.5	278156	242411	70326.6	369060	235946	70935.3	354523
Glyceraldehyde-3-phosphate dehydrogenase	97944.6	24997.2	63191.9	60085.6	69490.2	73012.1	585554	535758	386979		97944.6	60085.6	585554	24997.2	69490.2	535758	63191.9	73012.1	386979
Fructose-bisphosphate aldolase A	91851.1	103319	91584.4	111150	163605	143657	317880	398334	438916		91851.1	111150	317880	103319	163605	398334	91584.4	143657	438916
Programmed cell death 6-interacting protein	418900	403885	208842	109415	92029.9	76146.7	117787	189770	210176		418900	109415	117787	403885	92029.9	189770	208842	76146.7	210176
Basement membrane-specific heparan sulfate proteoglycan core protein	173632	77265.1	559335	254906	286380	234964	58106.7	80243.2	52899.9		173632	254906	58106.7	77265.1	286380	80243.2	559335	234964	52899.9
Annexin A1	124285	134809	123924	58687.6	75414.8	64182	359967	441867	393253		124285	58687.6	359967	134809	75414.8	441867	123924	64182	393253
Vitamin D-binding protein	154364	334870	128263	124046	107596	169575	224914	211379	286663		154364	124046	224914	334870	107596	211379	128263	169575	286663
Agrin	61332.2	229143	155433	74667.9	80673.6	77360.6	306046	304369	426188		61332.2	74667.9	306046	229143	80673.6	304369	155433	77360.6	426188
Cofilin-1	192129	208397	239464	242505	210346	298360	178317	63714.7	74015.4		192129	242505	178317	208397	210346	63714.7	239464	298360	74015.4
Testican-2	102657	92791.3	63974.4	75250.1	99460.8	82295.2	341458	403429	435205		102657	75250.1	341458	92791.3	99460.8	403429	63974.4	82295.2	435205
Proteasome subunit alpha type-6	82319.4	166674	82080.4	75010.4	86751.1	93752.1	477477	299162	253570		82319.4	75010.4	477477	166674	86751.1	299162	82080.4	93752.1	253570
Exostosin-1	383105	184686	169774	161324	159921	151223	115578	139658	128896		383105	161324	115578	184686	159921	139658	169774	151223	128896
Ras-related protein Rap-1b	135581	30166.4	83192.2	77477.9	76804	108941	318845	342466	406383		135581	77477.9	318845	30166.4	76804	342466	83192.2	108941	406383
T-complex protein 1 subunit eta	127912	113050	77941.7	69119.1	65403.5	75590.2	338457	381708	323535		127912	69119.1	338457	113050	65403.5	381708	77941.7	75590.2	323535
Filamin-A	68775.2	60611.5	50360.2	50691.8	61509.3	59981.7	341657	385549	463019		68775.2	50691.8	341657	60611.5	61509.3	385549	50360.2	59981.7	463019
T-complex protein 1 subunit beta	95579.5	73722.8	76241.6	61896.7	62040.1	63178.8	347949	324979	385633		95579.5	61896.7	347949	73722.8	62040.1	324979	76241.6	63178.8	385633
60 kDa heat shock protein	121762	110060	182112	55161.3	95692.6	60325.6	270766	236295	301966		121762	55161.3	270766	110060	95692.6	236295	182112	60325.6	301966
Glycogen phosphorylase	114860	116280	91621.3	207861	180297	213114	172462	135841	161195		114860	207861	172462	116280	180297	135841	91621.3	213114	161195
L-lactate dehydrogenase B chain	92081.9	133172	104931	63788.5	92215.9	69760.5	311174	259954	220337		92081.9	63788.5	311174	133172	92215.9	259954	104931	69760.5	220337
14-3-3 protein zeta/delta	68888.3	37360.7	51516.2	150220	138986	164284	216385	185932	330951		68888.3	150220	216385	37360.7	138986	185932	51516.2	164284	330951
Tubulin beta-1 chain	173234	250537	211116	56669.5	49154.6	46481.3	184852	180497	171348		173234	56669.5	184852	250537	49154.6	180497	211116	46481.3	171348
T-complex protein 1 subunit alpha	62327.9	65556.8	67796.6	42591.8	45469.2	57328.4	283441	270612	421469		62327.9	42591.8	283441	65556.8	45469.2	270612	67796.6	57328.4	421469
Pigment epithelium-derived factor	122325	212293	73181.9	80496.5	93095.8	88032.8	192858	207145	245807		122325	80496.5	192858	212293	93095.8	207145	73181.9	88032.8	245807
Fibronectin	98769.2	30128.7	82932.6	127937	129467	117179	205239	251935	242902		98769.2	127937	205239	30128.7	129467	251935	82932.6	117179	242902
Protein disulfide-isomerase	51899.5	16679.7	45999	57188.5	80312.5	75944.6	336879	261326	357807		51899.5	57188.5	336879	16679.7	80312.5	261326	45999	75944.6	357807
Tetranectin	94999.2	91594	84198.6	66794.1	86904.8	63916.6	250107	223863	318773		94999.2	66794.1	250107	91594	86904.8	223863	84198.6	63916.6	318773
Proteasome subunit beta type-5	161448	100067	160979	97686.4	100423	83091.6	322764	115558	91417.3		161448	97686.4	322764	100067	100423	115558	160979	83091.6	91417.3
Pregnancy zone protein	279694	283435	251245	57251.5	66278.8	53667	77101.4	73464.6	87263.3		279694	57251.5	77101.4	283435	66278.8	73464.6	251245	53667	87263.3
Inter-alpha-trypsin inhibitor heavy chain H3	123202	267268	163792	100232	132480	93956	102515	110110	111995		123202	100232	102515	267268	132480	110110	163792	93956	111995
UTP--glucose-1-phosphate uridylyltransferase	47380.2	68522.8	47242.6	44864.4	66711.3	56073.9	259169	299781	279504		47380.2	44864.4	259169	68522.8	66711.3	299781	47242.6	56073.9	279504
Fatty acid synthase	57123.3	46344.2	54179.1	49286.1	54150.3	51205.3	264660	290315	283494		57123.3	49286.1	264660	46344.2	54150.3	290315	54179.1	51205.3	283494
Eukaryotic initiation factor 4A-I	63460.8	45889.5	94914.8	46046.4	71075.9	50407.8	251085	296655	192012		63460.8	46046.4	251085	45889.5	71075.9	296655	94914.8	50407.8	192012
Threonine--tRNA ligase	239533	98977.4	68171.1	77588.6	80759.5	67882.1	126035	189522	160638		239533	77588.6	126035	98977.4	80759.5	189522	68171.1	67882.1	160638
Laminin subunit beta-1	79804.5	142050	116299	53579.3	43375.8	54689.1	208050	145737	265170		79804.5	53579.3	208050	142050	43375.8	145737	116299	54689.1	265170
Prolow-density lipoprotein receptor-related protein 1	174731	202161	133571	143851	83183.4	94391.4	91061.2	103094	75283.4		174731	143851	91061.2	202161	83183.4	103094	133571	94391.4	75283.4
Plectin	75880.5	45725.4	37830.1	117420	111355	125845	156312	213423	216111		75880.5	117420	156312	45725.4	111355	213423	37830.1	125845	216111
Proteasome subunit beta type-3	84721.8	73516.5	50685.5	65335	37780.6	71451.8	265998	228563	203416		84721.8	65335	265998	73516.5	37780.6	228563	50685.5	71451.8	203416
WD repeat-containing protein 1	96956.7	105166	72506.4	81471	65956	80188.7	172290	226177	170794		96956.7	81471	172290	105166	65956	226177	72506.4	80188.7	170794
Anterior gradient protein 2 homolog	153986	148466	204718	66960.3	58080.7	54921.9	111966	120261	142707		153986	66960.3	111966	148466	58080.7	120261	204718	54921.9	142707
Malate dehydrogenase	94760.4	171307	188971	61177.4	82544.9	89206.5	131755	117930	111952		94760.4	61177.4	131755	171307	82544.9	117930	188971	89206.5	111952
Actin-related protein 3	68020.5	36890.1	67823	39201	45336.8	57161.5	258847	278023	197948		68020.5	39201	258847	36890.1	45336.8	278023	67823	57161.5	197948
Cation-independent mannose-6-phosphate receptor	155515	224910	180907	135493	130584	86437.5	39372.8	42289.6	50182.5		155515	135493	39372.8	224910	130584	42289.6	180907	86437.5	50182.5
Ubiquitin-like modifier-activating enzyme 1	75466.8	40928.5	56435.8	63113.8	72992.4	69022.6	205187	209893	249067		75466.8	63113.8	205187	40928.5	72992.4	209893	56435.8	69022.6	249067
Integrin beta-1	188102	68009.9	140667	79639.2	69078.2	65321.3	73504.7	157900	187371		188102	79639.2	73504.7	68009.9	69078.2	157900	140667	65321.3	187371
Olfactomedin-like protein 3	154364	148831	76957.9	60626.2	70115.4	33151.1	180546	96960.6	191762		154364	60626.2	180546	148831	70115.4	96960.6	76957.9	33151.1	191762
Coronin-1C	65855.5	71431.8	65664.3	41437.9	38339	54380.8	190138	233398	242340		65855.5	41437.9	190138	71431.8	38339	233398	65664.3	54380.8	242340
Inter-alpha-trypsin inhibitor heavy chain H2	106302	143488	98927	68700.8	101123	95623.4	128103	126128	95243.2		106302	68700.8	128103	143488	101123	126128	98927	95623.4	95243.2
Alpha-actinin-4	62845.5	20974.4	28921.4	55688.4	47456.2	44875.2	235298	223568	230691		62845.5	55688.4	235298	20974.4	47456.2	223568	28921.4	44875.2	230691
Clathrin heavy chain 1	62374.4	45104	85515.8	65768.8	78175.8	59938.5	198890	170899	173825		62374.4	65768.8	198890	45104	78175.8	170899	85515.8	59938.5	173825
Neogenin	232704	252409	232029	54566	52588.9	59674.6	18315	9717.88	11671.7		232704	54566	18315	252409	52588.9	9717.88	232029	59674.6	11671.7
Cartilage oligomeric matrix protein	100297	101537	100006	63128.6	51106.6	48327.2	125286	173015	159683		100297	63128.6	125286	101537	51106.6	173015	100006	48327.2	159683
L-lactate dehydrogenase A chain	101660	98016.5	67576.9	82067.2	63274.9	59833.6	185175	165745	78514.2		101660	82067.2	185175	98016.5	63274.9	165745	67576.9	59833.6	78514.2
Cullin-associated NEDD8-dissociated protein 1	54415.1	61833.3	62008.2	53579.2	50049	63102.7	197723	186886	161285		54415.1	53579.2	197723	61833.3	50049	186886	62008.2	63102.7	161285
Proteasome subunit alpha type-4	68662.5	74476.5	102695	66137.7	38244.8	36164.8	272522	97570.4	115781		68662.5	66137.7	272522	74476.5	38244.8	97570.4	102695	36164.8	115781
26S proteasome non-ATPase regulatory subunit 2	133239	45340	46889	87276.2	78506.3	63631.5	121468	130467	126668		133239	87276.2	121468	45340	78506.3	130467	46889	63631.5	126668
Coagulation factor V	79136.6	102403	87212.9	42111	48702.2	53729.1	125437	134729	159875		79136.6	42111	125437	102403	48702.2	134729	87212.9	53729.1	159875
Receptor-type tyrosine-protein phosphatase S	98608.1	101864	84275.8	107755	104944	105439	60125.6	64579.8	91959.5		98608.1	107755	60125.6	101864	104944	64579.8	84275.8	105439	91959.5
26S proteasome regulatory subunit 6A	60878	44021.9	75876.6	49850.2	115306	109035	120994	108298	128511		60878	49850.2	120994	44021.9	115306	108298	75876.6	109035	128511
26S proteasome regulatory subunit 7	57623.6	47621.2	32832.2	46002.5	45602.4	35935.2	177823	171897	181315		57623.6	46002.5	177823	47621.2	45602.4	171897	32832.2	35935.2	181315
60S acidic ribosomal protein P0	60180.4	24867.1	25716.7	33068.8	28683.6	45206	113062	161917	288206		60180.4	33068.8	113062	24867.1	28683.6	161917	25716.7	45206	288206
Neutral alpha-glucosidase AB	61941.9	35833	24680.1	77554	97167.2	70679	119840	115846	152741		61941.9	77554	119840	35833	97167.2	115846	24680.1	70679	152741
Thrombospondin-4	84834.7	105164	72504.3	42390.6	30641	40564.4	96085.2	132690	122465		84834.7	42390.6	96085.2	105164	30641	132690	72504.3	40564.4	122465
Calsyntenin-1	66793	22291.9	30738	69416.2	54929.3	63928.5	129928	108542	128800		66793	69416.2	129928	22291.9	54929.3	108542	30738	63928.5	128800
ATP synthase subunit beta	60526.2	109419	75438	27467.4	31766.6	60077.9	93866.2	84016.7	99697.5		60526.2	27467.4	93866.2	109419	31766.6	84016.7	75438	60077.9	99697.5
Homogentisate 1	88952.9	73512.4	63353.3	46950.1	54298.7	51345.6	70285.5	125821	59721.5		88952.9	46950.1	70285.5	73512.4	54298.7	125821	63353.3	51345.6	59721.5
Fermitin family homolog 3	89411	43103.1	59434.3	112324	48714.3	61419.9	92842.7	56983.3	50713.9		89411	112324	92842.7	43103.1	48714.3	56983.3	59434.3	61419.9	50713.9
Golgi apparatus protein 1	95191.1	21737.1	59946.2	75897.5	58518	62252.4	60244.7	86277	76784.8		95191.1	75897.5	60244.7	21737.1	58518	86277	59946.2	62252.4	76784.8
Collagen alpha-1(VI) chain	99099.8	47773.8	65874.7	42825.5	42453	40144.2	38034.7	54469.8	80795		99099.8	42825.5	38034.7	47773.8	42453	54469.8	65874.7	40144.2	80795
A disintegrin and metalloproteinase with thrombospondin motifs 13	42233	81438.4	28073.6	62081.7	86158.5	81472.7	22692.3	15859	28922.5		42233	62081.7	22692.3	81438.4	86158.5	15859	28073.6	81472.7	28922.5
Hepatocyte growth factor activator	66272.3	95845.2	33040	41798.2	36255.3	45711.4	36964	38749.5	46028.8		66272.3	41798.2	36964	95845.2	36255.3	38749.5	33040	45711.4	46028.8
Spectrin beta chain	36787.2	35433.1	24453.6	40895.9	38303.3	72440.4	51412.4	73628.2	54606.3		36787.2	40895.9	51412.4	35433.1	38303.3	73628.2	24453.6	72440.4	54606.3
Receptor-type tyrosine-protein phosphatase F	55750.9	65969	50535.5	42526.1	30738.9	31973.9	44407.9	42398	50311.1		55750.9	42526.1	44407.9	65969	30738.9	42398	50535.5	31973.9	50311.1
Protocadherin Fat 4	63855.4	115437	47752.5	53053.9	35061.6	24866.1	19366.1	14857.7	10578.5		63855.4	53053.9	19366.1	115437	35061.6	14857.7	47752.5	24866.1	10578.5
Laminin subunit alpha-3	52648.1	69219.5	52495.2	49134.4	46170.3	36942.5	26526.5	28491.6	18782.9		52648.1	49134.4	26526.5	69219.5	46170.3	28491.6	52495.2	36942.5	18782.9
Receptor-type tyrosine-protein phosphatase delta	66212.4	20519.7	33010.1	43764.1	22495.1	26589.7	16394.6	35218.4	34826.2		66212.4	43764.1	16394.6	20519.7	22495.1	35218.4	33010.1	26589.7	34826.2

## Sheet: A549
	Technical replicates										Biological replicates
	TR1			TR2			TR3				BR1			BR2			BR3
	R1	R2	R3	R4	R5	R6	R7	R8	R9		R1	R4	R7	R2	R5	R8	R3	R6	R9
Histone H4	276519	127528	149072	1.5173e+07	1.04955e+07	1.59561e+07	446000	302724	342760		276519	1.5173e+07	446000	127528	1.04955e+07	302724	149072	1.59561e+07	342760
Histone H2A.V	71003	39729.2	35885.9	3.74642e+06	3.08692e+06	5.31869e+06	72680	72925.3	70337.3		71003	3.74642e+06	72680	39729.2	3.08692e+06	72925.3	35885.9	5.31869e+06	70337.3
Histone H2A.Z	71003	39729.2	35885.9	3.74642e+06	3.08692e+06	5.31869e+06	45137.9	48309.6	49507.4		71003	3.74642e+06	45137.9	39729.2	3.08692e+06	48309.6	35885.9	5.31869e+06	49507.4
Peptidyl-prolyl cis-trans isomerase A	85752.4	28846.9	26004.3	3.74642e+06	4.1159e+06	3.19121e+06	61705.3	41234.5	79621.8		85752.4	3.74642e+06	61705.3	28846.9	4.1159e+06	41234.5	26004.3	3.19121e+06	79621.8
Phosphoglycerate kinase 1	1.26246e+06	862649	959016	1.63906e+06	2.57244e+06	2.12748e+06	426323	444214	412581		1.26246e+06	1.63906e+06	426323	862649	2.57244e+06	444214	959016	2.12748e+06	412581
Aldo-keto reductase family 1 member B10	669738	387232	476963	2.18657e+06	2.05904e+06	1.41907e+06	378793	570107	549875		669738	2.18657e+06	378793	387232	2.05904e+06	570107	476963	1.41907e+06	549875
Proteasome subunit alpha type-5	1.57842e+06	497791	749394	936605	2.05795e+06	1.59561e+06	395041	429405	414166		1.57842e+06	936605	395041	497791	2.05795e+06	429405	749394	1.59561e+06	414166
26S proteasome regulatory subunit 6B	1.23483e+06	778868	762150	1.14947e+06	841889	725276	1.03619e+06	714788	626746		1.23483e+06	1.14947e+06	1.03619e+06	778868	841889	714788	762150	725276	626746
Pappalysin-1	998480	933019	884900	540349	712367	368217	758583	924246	839008		998480	540349	758583	933019	712367	924246	884900	368217	839008
Adenosylhomocysteinase	1.26791e+06	853045	642105	1.08767e+06	697048	823539	361837	403398	447445		1.26791e+06	1.08767e+06	361837	853045	697048	403398	642105	823539	447445
26S proteasome non-ATPase regulatory subunit 12	1.36544e+06	574165	726072	1.17076e+06	771731	797803	73757.9	105042	80590.8		1.36544e+06	1.17076e+06	73757.9	574165	771731	105042	726072	797803	80590.8
Elongation factor 2	1.32349e+06	841573	613035	795231	640682	903174	95048.3	119211	91984.6		1.32349e+06	795231	95048.3	841573	640682	119211	613035	903174	91984.6
Epoxide hydrolase 1	1.10322e+06	824714	931168	984165	772304	479037	70974.6	124625	103030		1.10322e+06	984165	70974.6	824714	772304	124625	931168	479037	103030
Elongation factor 1-gamma	1.56249e+06	716753	647418	561963	926077	478682	117179	131407	140085		1.56249e+06	561963	117179	716753	926077	131407	647418	478682	140085
T-complex protein 1 subunit zeta	889097	427272	514586	802804	771731	797803	298618	245595	222667		889097	802804	298618	427272	771731	245595	514586	797803	222667
Protein disulfide-isomerase A6	1.00132e+06	765554	898946	648419	633215	572782	126942	146965	141750		1.00132e+06	648419	126942	765554	633215	146965	898946	572782	141750
Laminin subunit alpha-5	712518	547567	597250	411996	452628	290110	522572	419469	505728		712518	411996	522572	547567	452628	419469	597250	290110	505728
Olfactomedin-like protein 3	262974	165870	124854	561963	617385	1.27649e+06	365801	314602	303437		262974	561963	365801	165870	617385	314602	124854	1.27649e+06	303437
UDP-glucose 6-dehydrogenase	339488	190339	214908	574735	912046	870331	139985	327734	270945		339488	574735	139985	190339	912046	327734	214908	870331	270945
Collagen alpha-1(II) chain	828368	796176	719157	133831	294059	531989	80597.4	161739	129999		828368	133831	80597.4	796176	294059	161739	719157	531989	129999
40S ribosomal protein S4, X isoform	313249	439068	396594	602103	440989	455888	308703	265496	298753		313249	602103	308703	439068	440989	265496	396594	455888	298753
Thrombospondin-1	362088	267973	203542	338927	324307	273178	532716	534514	596947		362088	338927	532716	267973	324307	534514	203542	273178	596947
DNA-dependent protein kinase catalytic subunit	364275	251647	256952	275472	332904	219005	600459	547714	581104		364275	275472	600459	251647	332904	547714	256952	219005	581104
Annexin A1	236230	102172	133306	95944.9	80310.2	103779	916811	879909	810106		236230	95944.9	916811	102172	80310.2	879909	133306	103779	810106
T-complex protein 1 subunit delta	301147	146626	192643	726676	691897	605230	128446	171839	186458		301147	726676	128446	146626	691897	171839	192643	605230	186458
Exostosin-1	163871	183753	207472	432279	593639	368217	353005	354197	455503		163871	432279	353005	183753	593639	354197	207472	368217	455503
Talin-1	319424	229000	202869	368328	497145	370515	331256	434643	345238		319424	368328	331256	229000	497145	434643	202869	370515	345238
Transforming growth factor-beta-induced protein ig-h3	105916	84126.3	87908	91805.8	97803.6	110587	746065	978917	777557		105916	91805.8	746065	84126.3	97803.6	978917	87908	110587	777557
Heat shock protein HSP 90-alpha	399392	335887	303394	198520	100661	104061	456787	491066	536791		399392	198520	456787	335887	100661	491066	303394	104061	536791
Peptidyl-prolyl cis-trans isomerase B	591775	373260	224768	535203	293993	303925	154140	216524	208840		591775	535203	154140	373260	293993	216524	224768	303925	208840
Transitional endoplasmic reticulum ATPase	318631	242446	184415	202682	192306	167413	545162	458776	578647		318631	202682	545162	242446	192306	458776	184415	167413	578647
Laminin subunit gamma-1	570627	373251	481635	285744	261604	216353	160524	187910	168295		570627	285744	160524	373251	261604	187910	481635	216353	168295
T-complex protein 1 subunit eta	131186	70609.1	71751	57449.7	40164.4	29658.1	714182	881960	691162		131186	57449.7	714182	70609.1	40164.4	881960	71751	29658.1	691162
78 kDa glucose-regulated protein	648847	318312	397051	287134	236589	279522	124960	188073	120932		648847	287134	124960	318312	236589	188073	397051	279522	120932
Large neutral amino acids transporter small subunit 1	115815	153057	113114	216140	237456	153424	631124	415249	560717		115815	216140	631124	153057	237456	415249	113114	153424	560717
Ras-related protein Rap-1b	98615.3	276450	199766	83736.2	81772.8	52834.7	586316	588294	627780		98615.3	83736.2	586316	276450	81772.8	588294	199766	52834.7	627780
Heat shock protein HSP 90-beta	482820	382164	366770	97854.2	153578	111137	254380	328164	369271		482820	97854.2	254380	382164	153578	328164	366770	111137	369271
ATP-dependent RNA helicase A	193017	259722	205273	446002	391990	202617	348175	218344	263244		193017	446002	348175	259722	391990	218344	205273	202617	263244
Protein disulfide-isomerase A3	368905	232685	157632	251625	207331	166705	359170	410435	357248		368905	251625	359170	232685	207331	410435	157632	166705	357248
Chloride intracellular channel protein 1	308709	259623	234508	290670	319337	220084	266826	325096	285892		308709	290670	266826	259623	319337	325096	234508	220084	285892
Glucose-6-phosphate 1-dehydrogenase	135895	80953.4	81724.9	65042	107185	96031.9	652736	654939	631697		135895	65042	652736	80953.4	107185	654939	81724.9	96031.9	631697
Protein-glutamine gamma-glutamyltransferase 2	208892	154596	120599	580540	510235	448352	125926	148012	139277		208892	580540	125926	154596	510235	148012	120599	448352	139277
Cytoplasmic dynein 1 heavy chain 1	295901	151263	189519	117234	116332	68721.1	448203	572366	453472		295901	117234	448203	151263	116332	572366	189519	68721.1	453472
Galectin-3-binding protein	149705	116908	138091	111345	122326	119020	553228	555096	507217		149705	111345	553228	116908	122326	555096	138091	119020	507217
Cytoplasmic aconitate hydratase	637310	344555	380386	218977	200477	248700	117938	118336	95114		637310	218977	117938	344555	200477	118336	380386	248700	95114
26S proteasome non-ATPase regulatory subunit 2	99043.6	96109.9	81025.1	197881	239136	134845	469599	530082	511270		99043.6	197881	469599	96109.9	239136	530082	81025.1	134845	511270
ATP-citrate synthase	337149	179383	224752	153699	131920	180017	359736	445880	286704		337149	153699	359736	179383	131920	445880	224752	180017	286704
Integrin beta-1	224558	161873	138091	110355	149217	96411.3	453906	455438	470652		224558	110355	453906	161873	149217	455438	138091	96411.3	470652
Cathepsin B	183827	144935	130915	156827	172293	178114	418367	457941	386478		183827	156827	418367	144935	172293	457941	130915	178114	386478
Cation-independent mannose-6-phosphate receptor	184639	131392	107892	128694	212079	219244	399646	400995	386764		184639	128694	399646	131392	212079	400995	107892	219244	386764
Integrin alpha-3	70068.7	72022.5	65055.3	75940.9	95349	73927.7	639926	548879	529401		70068.7	75940.9	639926	72022.5	95349	548879	65055.3	73927.7	529401
Lactadherin	48537.2	58313.7	42138.1	33056.6	21790.1	30035	667807	670061	592424		48537.2	33056.6	667807	58313.7	21790.1	670061	42138.1	30035	592424
Vacuolar protein sorting-associated protein 35	152248	213400	269859	229373	377991	130254	203514	317645	262605		152248	229373	203514	213400	377991	317645	269859	130254	262605
Fibulin-1	135060	108176	112368	110828	114596	118467	484274	441735	511270		135060	110828	484274	108176	114596	441735	112368	118467	511270
Protein disulfide-isomerase	72522.5	66799.8	52467.7	41074.9	55153.7	41466.9	487147	706032	576211		72522.5	41074.9	487147	66799.8	55153.7	706032	52467.7	41466.9	576211
Tetranectin	59566.3	60113.9	63348.6	55824.1	81772.8	52834.7	567312	637533	505103		59566.3	55824.1	567312	60113.9	81772.8	637533	63348.6	52834.7	505103
Basement membrane-specific heparan sulfate proteoglycan core protein	117224	161961	95408.7	187050	165291	120075	287040	493729	436523		117224	187050	287040	161961	165291	493729	95408.7	120075	436523
Prolow-density lipoprotein receptor-related protein 1	171580	116666	122019	163585	200862	180325	330470	331585	351800		171580	163585	330470	116666	200862	331585	122019	180325	351800
Aldo-keto reductase family 1 member C2	110418	107148	90330.4	129689	189973	143463	434667	414327	336525		110418	129689	434667	107148	189973	414327	90330.4	143463	336525
Ubiquitin-like modifier-activating enzyme 1	64801.3	42819.5	49225.7	75262.9	110247	85478.9	523370	459494	506500		64801.3	75262.9	523370	42819.5	110247	459494	49225.7	85478.9	506500
Inter-alpha-trypsin inhibitor heavy chain H3	117367	86366.9	55723	94846.1	78150	107720	477780	449431	404583		117367	94846.1	477780	86366.9	78150	449431	55723	107720	404583
Annexin A2	126894	87314.2	107348	92538.8	92422.9	79621.1	425750	427187	412027		126894	92538.8	425750	87314.2	92422.9	427187	107348	79621.1	412027
Alpha-enolase	128047	161530	129693	106702	107456	141383	292720	375293	314761		128047	106702	292720	161530	107456	375293	129693	141383	314761
Prosaposin	77744.4	87176.9	59057.8	47767.4	83090.7	72335	441113	477728	386237		77744.4	47767.4	441113	87176.9	83090.7	477728	59057.8	72335	386237
Annexin A3	73725.2	57233.1	34464.4	36255.7	39831.3	20588.5	525681	479504	462487		73725.2	36255.7	525681	57233.1	39831.3	479504	34464.4	20588.5	462487
T-complex protein 1 subunit beta	81172.3	29256.6	35235.3	54559.5	59940.3	51637.8	530115	379931	476383		81172.3	54559.5	530115	29256.6	59940.3	379931	35235.3	51637.8	476383
Annexin A5	56439	117546	42469.9	64487.6	30363.2	31389	408104	545975	394950		56439	64487.6	408104	117546	30363.2	545975	42469.9	31389	394950
Keratin, type II cytoskeletal 7	194825	145642	147997	98016.8	78967.8	118743	278597	239604	250359		194825	98016.8	278597	145642	78967.8	239604	147997	118743	250359
Proteasome subunit alpha type-3	92142	38745.5	43746.8	78779.9	115399	149122	293500	373021	359783		92142	78779.9	293500	38745.5	115399	373021	43746.8	149122	359783
26S proteasome regulatory subunit 7	55385.7	55894.9	67317.2	61349.7	94360.1	55741.7	547033	274440	330875		55385.7	61349.7	547033	55894.9	94360.1	274440	67317.2	55741.7	330875
6-phosphogluconate dehydrogenase, decarboxylating	83141.7	76913.9	50526.3	128891	141602	102470	312850	342442	302766		83141.7	128891	312850	76913.9	141602	342442	50526.3	102470	302766
Proteoglycan 4	50356.7	84699.6	57379.6	27017.4	29682	20456.5	486328	390376	376522		50356.7	27017.4	486328	84699.6	29682	390376	57379.6	20456.5	376522
Glycine--tRNA ligase	100024	210299	151964	293563	184294	142890	151595	136896	146709		100024	293563	151595	210299	184294	136896	151964	142890	146709
Cullin-associated NEDD8-dissociated protein 1	38499.1	34690.2	25067.6	32408.5	32044.2	29446	394032	395361	524330		38499.1	32408.5	394032	34690.2	32044.2	395361	25067.6	29446	524330
Tsukushin	265432	251130	226837	104067	114331	118193	148677	138523	123330		265432	104067	148677	251130	114331	138523	226837	118193	123330
Alpha-actinin-4	73813.6	88109.2	75968.3	59685.6	60527.9	39108	293835	442240	355455		73813.6	59685.6	293835	88109.2	60527.9	442240	75968.3	39108	355455
Pregnancy zone protein	206812	159434	130919	45441.7	83205.5	42922.3	261123	302312	252706		206812	45441.7	261123	159434	83205.5	302312	130919	42922.3	252706
Multifunctional protein ADE2	83729.9	70416.5	114488	44041	48384.4	40015.2	351829	353016	366680		83729.9	44041	351829	70416.5	48384.4	353016	114488	40015.2	366680
Prelamin-A/C	42645.3	35864.5	32395.1	42897.9	141386	146162	310012	358913	326395		42645.3	42897.9	310012	35864.5	141386	358913	32395.1	146162	326395
Pyruvate kinase PKM	105939	71275.7	69745.8	97466.3	79544.1	79068.7	327941	329048	253896		105939	97466.3	327941	71275.7	79544.1	329048	69745.8	79068.7	253896
Glyceraldehyde-3-phosphate dehydrogenase	109420	71242.3	77757	71740	78815.1	58845.1	275113	301136	363062		109420	71740	275113	71242.3	78815.1	301136	77757	58845.1	363062
Fatty acid synthase	49110.5	38242.3	35233.8	31874	33670.6	20884.9	353236	379745	439522		49110.5	31874	353236	38242.3	33670.6	379745	35233.8	20884.9	439522
Protocadherin Fat 1	46288.2	38928.1	35162.4	31541.4	31764.4	20896.6	385658	464352	323464		46288.2	31541.4	385658	38928.1	31764.4	464352	35162.4	20896.6	323464
T-complex protein 1 subunit alpha	55762.1	31263.8	36307.8	38596.4	50883.4	43835.4	403582	357304	321649		55762.1	38596.4	403582	31263.8	50883.4	357304	36307.8	43835.4	321649
Procollagen-lysine,2-oxoglutarate 5-dioxygenase 1	257313	216399	195466	77512.1	85156.5	66025.1	125051	125473	169429		257313	77512.1	125051	216399	85156.5	125473	195466	66025.1	169429
A disintegrin and metalloproteinase with thrombospondin motifs 13	54202.2	34187.8	41174.2	48237.2	52994.4	68481	350170	310811	338883		54202.2	48237.2	350170	34187.8	52994.4	310811	41174.2	68481	338883
Proteasome subunit alpha type-2	65140.3	29881.4	35987.8	77077.2	84678.7	79581.4	338297	282865	272827		65140.3	77077.2	338297	29881.4	84678.7	282865	35987.8	79581.4	272827
Clathrin heavy chain 1	72670.1	53925.2	53579.6	55778	66750.2	45249.4	327941	262712	317370		72670.1	55778	327941	53925.2	66750.2	262712	53579.6	45249.4	317370
Glycogen phosphorylase, brain form	110516	92943	89948.7	158299	260867	112367	214255	85991.1	124409		110516	158299	214255	92943	260867	85991.1	89948.7	112367	124409
Calnexin	197231	138225	99882.9	53266.6	73149.9	45372.7	269315	198164	173756		197231	53266.6	269315	138225	73149.9	198164	99882.9	45372.7	173756
Glycogen phosphorylase, liver form	66144.9	38939.3	35172.5	51793.8	56901.8	57294.8	360092	252915	313636		66144.9	51793.8	360092	38939.3	56901.8	252915	35172.5	57294.8	313636
Filamin-B	67073.7	47236.6	47223.8	45497.8	52127.1	48720.8	329623	264059	318998		67073.7	45497.8	329623	47236.6	52127.1	264059	47223.8	48720.8	318998
Cathepsin D	77869.7	26790.6	51086.7	49543.3	50541.6	48229.9	347440	261459	294211		77869.7	49543.3	347440	26790.6	50541.6	261459	51086.7	48229.9	294211
Fermitin family homolog 3	86064.2	72379.6	73550.2	78990.8	86781	76896.7	149698	319181	253527		86064.2	78990.8	149698	72379.6	86781	319181	73550.2	76896.7	253527
Proteasome subunit alpha type-4	55126.5	64905.6	41876.4	54034.9	89045.9	61369.5	272069	261613	274271		55126.5	54034.9	272069	64905.6	89045.9	261613	41876.4	61369.5	274271
26S proteasome non-ATPase regulatory subunit 11	137725	115826	104622	93660.5	25724.4	26593.4	231627	203357	224161		137725	93660.5	231627	115826	25724.4	203357	104622	26593.4	224161
Proteasome subunit alpha type-1	58973.2	19838.5	35838.7	79899.9	117040	60496.9	198384	258770	326382		58973.2	79899.9	198384	19838.5	117040	258770	35838.7	60496.9	326382
26S proteasome regulatory subunit 4	218845	163598	203187	89918	74089.4	51061.7	117400	117796	113616		218845	89918	117400	163598	74089.4	117796	203187	51061.7	113616
Cytosolic 10-formyltetrahydrofolate dehydrogenase	105491	147862	133558	62440.3	205795	141832	114257	109184	121105		105491	62440.3	114257	147862	205795	109184	133558	141832	121105
X-ray repair cross-complementing protein 6	89311.9	46944.3	50883.8	107249	70695.7	73084.1	221643	222391	243098		89311.9	107249	221643	46944.3	70695.7	222391	50883.8	73084.1	243098
U5 small nuclear ribonucleoprotein 200 kDa helicase	96302.3	70866	73155.1	39299.4	28783.5	14877.9	197084	305613	294767		96302.3	39299.4	197084	70866	28783.5	305613	73155.1	14877.9	294767
Apolipoprotein E	154354	77886.8	164155	71436	78481.1	108177	150648	163753	145792		154354	71436	150648	77886.8	78481.1	163753	164155	108177	145792
Collagen alpha-1(VI) chain	55259.7	58091.5	52472	35300.3	29086.3	20046	279801	249551	300869		55259.7	35300.3	279801	58091.5	29086.3	249551	52472	20046	300869
Laminin subunit beta-1	72970.9	72040.9	72302.2	41119.2	45174.5	18680.3	229266	262903	253573		72970.9	41119.2	229266	72040.9	45174.5	262903	72302.2	18680.3	253573
Proteasome subunit beta type-3	66669.5	70085.9	63306.1	94561.1	59363.9	92054.2	230146	197934	190909		66669.5	94561.1	230146	70085.9	59363.9	197934	63306.1	92054.2	190909
Plectin	65391.1	35584.1	46751.8	95949.1	124235	85621.7	284619	190386	91814.9		65391.1	95949.1	284619	35584.1	124235	190386	46751.8	85621.7	91814.9
Hemoglobin subunit alpha	153633	99388.2	80796.4	83258.1	111796	115573	100628	151452	121731		153633	83258.1	100628	99388.2	111796	151452	80796.4	115573	121731
WD repeat-containing protein 1	44516.9	56157.8	50725.3	49512.2	54395.1	70291	155822	245689	280055		44516.9	49512.2	155822	56157.8	54395.1	245689	50725.3	70291	280055
L-lactate dehydrogenase B chain	90162.5	75826.3	59929.8	73555.4	80809.5	100248	172859	164314	176092		90162.5	73555.4	172859	75826.3	80809.5	164314	59929.8	100248	176092
RuvB-like 1	48632.9	47716.7	49258	32358.7	29625	24500.7	230015	230791	272068		48632.9	32358.7	230015	47716.7	29625	230791	49258	24500.7	272068
Isoleucine--tRNA ligase, cytoplasmic	40147.5	33763.9	17427.3	37217.3	102219	42269.1	212484	243658	235011		40147.5	37217.3	212484	33763.9	102219	243658	17427.3	42269.1	235011
40S ribosomal protein S16	58009	58542.3	44066	41320.8	60527.9	31286.4	220573	235150	213463		58009	41320.8	220573	58542.3	60527.9	235150	44066	31286.4	213463
Tubulin alpha-4A chain	98890	74849.4	67608.8	55517.7	60993	56047.7	170457	171032	192456		98890	55517.7	170457	74849.4	60993	171032	67608.8	56047.7	192456
Keratin, type II cytoskeletal 8	140666	73233.2	111944	114827	133572	138085	75600.2	82357.3	75253.8		140666	114827	75600.2	73233.2	133572	82357.3	111944	138085	75253.8
GTP-binding nuclear protein Ran	52208.1	29271.2	33049.5	68532.1	75290.8	31133.8	188356	207891	236970		52208.1	68532.1	188356	29271.2	75290.8	207891	33049.5	31133.8	236970
Proteasome subunit alpha type-6	70126.4	44232	39953.2	177196	194671	229997	59263.7	49553.1	52574		70126.4	177196	59263.7	44232	194671	49553.1	39953.2	229997	52574
Alpha-fetoprotein	32079.7	44964.7	32492	47624	78481.1	54088.4	207762	208463	201065		32079.7	47624	207762	44964.7	78481.1	208463	32492	54088.4	201065
Protocadherin Fat 4	51887.6	49871.1	45046.8	59784.2	103212	58199.4	117938	207089	199739		51887.6	59784.2	117938	49871.1	103212	207089	45046.8	58199.4	199739
Thrombospondin-4	46537.5	33546.7	40402.1	26658.6	35145.3	18166.3	240286	210959	232540		46537.5	26658.6	240286	33546.7	35145.3	210959	40402.1	18166.3	232540
Serpin H1	55256	29043.8	36727.9	46520.1	40886.4	31700.8	207343	228847	200660		55256	46520.1	207343	29043.8	40886.4	228847	36727.9	31700.8	200660
Periostin	130021	123610	98769.6	95394.9	109567	113268	94074.5	47196	63729.5		130021	95394.9	94074.5	123610	109567	47196	98769.6	113268	63729.5
Pigment epithelium-derived factor	65440.5	68794	37283.5	63284.1	69525.3	71874.2	129443	162349	203564		65440.5	63284.1	129443	68794	69525.3	162349	37283.5	71874.2	203564
Sulfhydryl oxidase 1	67752.6	79771.4	72054.7	93660.5	154346	159561	66469.9	93371.9	77192.8		67752.6	93660.5	66469.9	79771.4	154346	93371.9	72054.7	159561	77192.8
26S proteasome regulatory subunit 6A	81616.3	61775	68199	65344.5	86146.7	59371.4	140112	140585	146895		81616.3	65344.5	140112	61775	86146.7	140585	68199	59371.4	146895
26S proteasome regulatory subunit 8	166177	114344	114759	45613.9	50112.4	31083.2	48177.2	161133	108790		166177	45613.9	48177.2	114344	50112.4	161133	114759	31083.2	108790
Neutral alpha-glucosidase AB	57383.9	35390.4	37779	137369	123477	42549.5	110464	124692	146993		57383.9	137369	110464	35390.4	123477	124692	37779	42549.5	146993
Alpha-actinin-1	48598.9	44958.6	33225.9	35516.5	65870.4	52619.4	184968	159079	179006		48598.9	35516.5	184968	44958.6	65870.4	159079	33225.9	52619.4	179006
Endoplasmin	126791	101019	96315.7	80089.7	58658.9	60640.6	80345.5	107489	86395.2		126791	80089.7	80345.5	101019	58658.9	107489	96315.7	60640.6	86395.2
Proteasome subunit beta type-6	50002.1	70085.9	63306.1	52033.6	42874	44322.4	113138	170279	191609		50002.1	52033.6	113138	70085.9	42874	170279	63306.1	44322.4	191609
Lysyl oxidase homolog 2	57538.9	43550.9	56821.6	72278.2	79406.4	71828	141891	128132	123462		57538.9	72278.2	141891	43550.9	79406.4	128132	56821.6	71828	123462
Procollagen-lysine,2-oxoglutarate 5-dioxygenase 2	45297	28570.9	17204.7	32824.9	43274.6	22368.3	202645	228745	147085		45297	32824.9	202645	28570.9	43274.6	228745	17204.7	22368.3	147085
Aldose reductase	69501.7	73063.2	52796.3	102175	140315	116044	65386.6	84742.7	58005.7		69501.7	102175	65386.6	73063.2	140315	84742.7	52796.3	116044	58005.7
Coagulation factor V	51611.7	55806.7	56009.1	33252.2	29225.3	33989.3	139277	139747	134788		51611.7	33252.2	139277	55806.7	29225.3	139747	56009.1	33989.3	134788
C-1-tetrahydrofolate synthase, cytoplasmic	44733.4	27360.4	21624.5	37251.7	9442.1	36264.1	190320	156242	133953		44733.4	37251.7	190320	27360.4	9442.1	156242	21624.5	36264.1	133953
Vitamin D-binding protein	93649	42959.1	71139.7	73700.1	80968.5	83704	93266.8	31193.9	60173.7		93649	73700.1	93266.8	42959.1	80968.5	31193.9	71139.7	83704	60173.7
Inter-alpha-trypsin inhibitor heavy chain H2	66194.2	69586.3	62854.8	57343.2	62998.5	86835.7	57993.7	87284.2	74832.6		66194.2	57343.2	57993.7	69586.3	62998.5	87284.2	62854.8	86835.7	74832.6
Coronin-1C	124567	78570	70969.5	27614.9	30338.3	15681.6	48941.4	98213.2	126304		124567	27614.9	48941.4	78570	30338.3	98213.2	70969.5	15681.6	126304
Tubulin beta chain	99599	52118.7	58846.2	44179.5	51772.3	36796	88580.7	88879.7	96441.2		99599	44179.5	88580.7	52118.7	51772.3	88879.7	58846.2	36796	96441.2
Proteasome subunit alpha type-7	41121.4	57638.2	62475	41729.9	53486.3	63192.3	108198	94992.8	91621.7		41121.4	41729.9	108198	57638.2	53486.3	94992.8	62475	63192.3	91621.7
Dolichyl-diphosphooligosaccharide--protein glycosyltransferase subunit 1	40620.9	47826.8	37028.8	31419.7	14793.6	10195.6	107127	134361	181430		40620.9	31419.7	107127	47826.8	14793.6	134361	37028.8	10195.6	181430
L-lactate dehydrogenase A chain	69021.5	99191.3	71676.8	96062	105536	54441.6	30366.8	30469.3	39184		69021.5	96062	30366.8	99191.3	105536	30469.3	71676.8	54441.6	39184
Proteasome subunit beta type-2	124567	52380	94625.9	55094.4	90791.9	78216	20665.3	32583.6	34284.3		124567	55094.4	20665.3	52380	90791.9	32583.6	94625.9	78216	34284.3
40S ribosomal protein S3	41556.9	34949.2	45097.6	55230.6	60677.5	62727.5	99911.5	100249	80575.9		41556.9	55230.6	99911.5	34949.2	60677.5	100249	45097.6	62727.5	80575.9
Tubulin beta-1 chain	91500.2	76951.3	90359.5	55067.9	86694.2	21838.7	31820	53212.3	56456.3		91500.2	55067.9	31820	76951.3	86694.2	53212.3	90359.5	21838.7	56456.3
40S ribosomal protein S8	51204.1	43062.4	51862.3	32618.1	25596.4	15876.7	109473	141226	75674.7		51204.1	32618.1	109473	43062.4	25596.4	141226	51862.3	15876.7	75674.7
Clusterin	70457.1	59254.1	49061.9	45936	50466.3	62605.5	81195.5	54313	52385.6		70457.1	45936	81195.5	59254.1	50466.3	54313	49061.9	62605.5	52385.6
Collagen alpha-1(XII) chain	33282.7	27990.6	23176	29341.3	17065.6	3920.47	165076	144929	79877.5		33282.7	29341.3	165076	27990.6	17065.6	144929	23176	3920.47	79877.5
Moesin	88352.1	67548.9	49366.8	92125.1	70847.5	73241	22520.2	30128.3	14529.5		88352.1	92125.1	22520.2	67548.9	70847.5	30128.3	49366.8	73241	14529.5
EH domain-containing protein 3	151077	63527.6	57382.3	24286.6	12481.9	27721.9	49253.9	49420.2	71499.5		151077	24286.6	49253.9	63527.6	12481.9	49420.2	57382.3	27721.9	71499.5
Importin subunit beta-1	71962.5	40346.7	24295.9	47508.9	44738	38541.2	80633.5	80905.6	55738.9		71962.5	47508.9	80633.5	40346.7	44738	80905.6	24295.9	38541.2	55738.9
40S ribosomal protein S9	68508.7	28807.8	39031.5	46890.2	51514.6	42604	41771.8	73347.4	80850.8		68508.7	46890.2	41771.8	28807.8	51514.6	73347.4	39031.5	42604	80850.8
60S ribosomal protein L18	35430.6	35756.4	32297.5	41729.9	91690.8	78990.4	39514.2	52863.4	50987.3		35430.6	41729.9	39514.2	35756.4	91690.8	52863.4	32297.5	78990.4	50987.3
Splicing factor 3B subunit 1	40114.7	33736.3	45709.1	22937.3	37799.1	39076.1	64972.5	74504.9	89826.1		40114.7	22937.3	64972.5	33736.3	37799.1	74504.9	45709.1	39076.1	89826.1
40S ribosomal protein SA	48919.4	41141	31852.4	41937.5	53752.4	39691.7	75508.3	50508.7	48716.3		48919.4	41937.5	75508.3	41141	53752.4	50508.7	31852.4	39691.7	48716.3
Aspartate--tRNA ligase, cytoplasmic	39519.3	16617.8	35023.9	26760.1	22049.5	22794.4	95476.9	82113.5	79199.4		39519.3	26760.1	95476.9	16617.8	22049.5	82113.5	35023.9	22794.4	79199.4
Actin-related protein 3	56492.5	23755	42914	42882.2	47111.3	38923.4	49092.7	49258.4	47510.3		56492.5	42882.2	49092.7	23755	47111.3	49258.4	42914	38923.4	47510.3
Aldehyde dehydrogenase, dimeric NADP-preferring	55579.6	40899.4	63330.9	33383.9	42789.1	50553.9	22882.9	22960.1	25308.9		55579.6	33383.9	22882.9	40899.4	42789.1	22960.1	63330.9	50553.9	25308.9
Ras GTPase-activating-like protein IQGAP1	28922.2	12161.7	32955.7	21206.1	81541.4	24084.6	32218.7	32327.5	31180.2		28922.2	21206.1	32218.7	12161.7	81541.4	32327.5	32955.7	24084.6	31180.2
Serine/threonine-protein phosphatase 2A 65 kDa regulatory subunit A alpha isoform	31768.7	46755.3	18099.6	46062.5	35423.7	20926	30902.1	15487.7	29906		31768.7	46062.5	30902.1	46755.3	35423.7	15487.7	18099.6	20926	29906

## Sheet: H1975
	Technical replicates										Biological replicates
	TR1			TR2			TR3				BR1			BR2			BR3
	R1	R2	R3	R4	R5	R6	R7	R8	R9		R1	R4	R7	R2	R5	R8	R3	R6	R9
Histone H4	151947	139398	153253	1.69462e+06	1.77082e+06	1.36057e+06	1.48107e+06	1.40714e+06	1.73693e+06		151947	1.69462e+06	1.48107e+06	139398	1.77082e+06	1.40714e+06	153253	1.36057e+06	1.73693e+06
Protein disulfide-isomerase A6	2.04171e+06	1.67592e+06	1.41056e+06	478398	581904	533463	346744	427840	322735		2.04171e+06	478398	346744	1.67592e+06	581904	427840	1.41056e+06	533463	322735
Transforming growth factor-beta-induced protein ig-h3	137486	106312	115508	1.03984e+06	1.10478e+06	1.07178e+06	1.25935e+06	1.23405e+06	1.27277e+06		137486	1.03984e+06	1.25935e+06	106312	1.10478e+06	1.23405e+06	115508	1.07178e+06	1.27277e+06
Phosphoglycerate kinase 1	1.18421e+06	1.18034e+06	1.38126e+06	627676	659370	664928	487058	539332	549230		1.18421e+06	627676	487058	1.18034e+06	659370	539332	1.38126e+06	664928	549230
Adenosylhomocysteinase	1.50773e+06	1.13447e+06	923274	669005	713354	671409	371391	390689	325733		1.50773e+06	669005	371391	1.13447e+06	713354	390689	923274	671409	325733
Glyceraldehyde-3-phosphate dehydrogenase	96591.5	63429.1	90695	493321	528721	609346	1.64208e+06	1.7274e+06	1.38877e+06		96591.5	493321	1.64208e+06	63429.1	528721	1.7274e+06	90695	609346	1.38877e+06
Peptidyl-prolyl cis-trans isomerase B	1.66803e+06	1.24472e+06	990485	276252	343659	346556	438186	360445	356865		1.66803e+06	276252	438186	1.24472e+06	343659	360445	990485	346556	356865
Tubulin beta chain	69351.9	49164.1	59198.3	1.10055e+06	1.14091e+06	1.05848e+06	688665	761215	741134		69351.9	1.10055e+06	688665	49164.1	1.14091e+06	761215	59198.3	1.05848e+06	741134
Elongation factor 2	849766	610333	659127	464208	475569	369960	794542	741900	699552		849766	464208	794542	610333	475569	741900	659127	369960	699552
Annexin A2	125086	83423.7	105322	939010	1.06801e+06	726982	710804	697650	789393		125086	939010	710804	83423.7	1.06801e+06	697650	105322	726982	789393
Fascin	1.25644e+06	1.03134e+06	769395	335916	401167	269699	421959	358931	343649		1.25644e+06	335916	421959	1.03134e+06	401167	358931	769395	269699	343649
Elongation factor 1-gamma	1.46585e+06	1.03134e+06	854883	331987	371695	291533	102963	259382	251564		1.46585e+06	331987	102963	1.03134e+06	371695	259382	854883	291533	251564
78 kDa glucose-regulated protein	558149	402618	621434	575221	616498	399661	418878	642310	578454		558149	575221	418878	402618	616498	642310	621434	399661	578454
Alpha-enolase	130448	92475.9	106509	926033	801385	888953	698320	561757	602176		130448	926033	698320	92475.9	801385	561757	106509	888953	602176
Protein disulfide-isomerase A3	531369	345928	478734	717172	563474	530342	270673	562813	563345		531369	717172	270673	345928	563474	562813	478734	530342	563345
Calreticulin	115125	70874.6	117497	862525	1.24857e+06	708238	663902	347528	393230		115125	862525	663902	70874.6	1.24857e+06	347528	117497	708238	393230
Pyruvate kinase PKM	84956.5	79698.1	69365.4	623591	873438	834442	613838	662726	661655		84956.5	623591	613838	79698.1	873438	662726	69365.4	834442	661655
Annexin A1	135498	96055.9	120689	936796	722536	517089	526700	644467	621979		135498	936796	526700	96055.9	722536	644467	120689	517089	621979
Annexin A5	117008	80037.3	83592.8	771068	527567	483649	588851	529791	659406		117008	771068	588851	80037.3	527567	529791	83592.8	483649	659406
Tubulin alpha-4A chain	85152.9	69897	74491.9	501084	674686	680373	625477	552512	532551		85152.9	501084	625477	69897	674686	552512	74491.9	680373	532551
Thrombospondin-1	309456	320861	518629	479849	404079	432181	437315	393454	460034		309456	479849	437315	320861	404079	393454	518629	432181	460034
26S proteasome non-ATPase regulatory subunit 12	999441	820382	816025	117051	174735	117472	129711	342324	211277		999441	117051	129711	820382	174735	342324	816025	117472	211277
60 kDa heat shock protein	553693	384572	347754	501833	499426	346250	266927	307399	391301		553693	501833	266927	384572	499426	307399	347754	346250	391301
Heat shock cognate 71 kDa protein	89586.7	73536.5	73145.9	568153	610663	478963	615905	537340	516801		89586.7	568153	615905	73536.5	610663	537340	73145.9	478963	516801
Protein disulfide-isomerase A4	950819	731692	630765	252186	278863	140607	201208	193096	163866		950819	252186	201208	731692	278863	193096	630765	140607	163866
Plasminogen activator inhibitor 1	561388	614414	534757	292628	291225	293680	300091	339419	279312		561388	292628	300091	614414	291225	339419	534757	293680	279312
Galectin-3-binding protein	178650	157924	134644	534757	404467	429343	551448	378870	449107		178650	534757	551448	157924	404467	378870	134644	429343	449107
Transitional endoplasmic reticulum ATPase	414862	289456	304854	441890	232820	208695	301860	398323	512163		414862	441890	301860	289456	232820	398323	304854	208695	512163
40S ribosomal protein SA	43432.5	35651.2	35461.8	514919	576506	258385	570450	586554	464582		43432.5	514919	570450	35651.2	576506	586554	35461.8	258385	464582
Protein disulfide-isomerase	87183.1	44727.2	65251.4	451151	710897	603696	339824	338667	383203		87183.1	451151	339824	44727.2	710897	338667	65251.4	603696	383203
Major vault protein	230296	198986	197929	351708	370611	332209	337551	512909	442905		230296	351708	337551	198986	370611	512909	197929	332209	442905
Fructose-bisphosphate aldolase A	77187.1	71278.2	70899.6	588523	540647	363469	350673	540860	367191		77187.1	588523	350673	71278.2	540647	540860	70899.6	363469	367191
Ubiquitin-like modifier-activating enzyme 1	137423	203045	134644	412676	339271	342131	348723	528416	463376		137423	412676	348723	203045	339271	528416	134644	342131	463376
Proteasome subunit alpha type-2	65686	44931.5	53631.4	423656	421624	212589	396501	684927	581248		65686	423656	396501	44931.5	421624	684927	53631.4	212589	581248
Malate dehydrogenase	73048.8	63958.9	71571.6	590406	677971	455791	306215	330603	290950		73048.8	590406	306215	63958.9	677971	330603	71571.6	455791	290950
Heat shock protein HSP 90-alpha	206943	203841	160517	349507	422366	425926	417496	343426	323823		206943	349507	417496	203841	422366	343426	160517	425926	323823
14-3-3 protein zeta/delta	63092.4	46609.9	51513.8	479745	557019	481469	419619	258879	488205		63092.4	479745	419619	46609.9	557019	258879	51513.8	481469	488205
Proteasome subunit alpha type-7	51939.4	56845.4	35339.7	357493	498090	645799	337372	323771	412141		51939.4	357493	337372	56845.4	498090	323771	35339.7	645799	412141
Glutathione S-transferase P	86736.5	64077.2	63736.8	547619	544993	457989	386957	222814	315143		86736.5	547619	386957	64077.2	544993	222814	63736.8	457989	315143
10 kDa heat shock protein	63163.9	51847.6	103144	330057	437966	331243	336837	565699	457207		63163.9	330057	336837	51847.6	437966	565699	103144	331243	457207
Eukaryotic initiation factor 4A-I	61418.1	70580.4	50146.8	308532	307052	348345	488031	454580	537738		61418.1	308532	488031	70580.4	307052	454580	50146.8	348345	537738
Chloride intracellular channel protein 1	258679	212334	528016	566283	281784	284159	208046	149744	112957		258679	566283	208046	212334	281784	149744	528016	284159	112957
L-lactate dehydrogenase B chain	137423	124083	112203	565187	187492	315121	414699	298484	434232		137423	565187	414699	124083	187492	298484	112203	315121	434232
Proteasome subunit alpha type-6	56219	35892	20400.8	159019	395642	478772	505255	424274	480068		56219	159019	505255	35892	395642	424274	20400.8	478772	480068
Serpin H1	87622.2	58438.2	58127.8	435352	519917	436916	295084	303414	308983		87622.2	435352	295084	58438.2	519917	303414	58127.8	436916	308983
Moesin	137815	123408	163670	469819	428603	432215	246180	255943	245046		137815	469819	246180	123408	428603	255943	163670	432215	245046
ATP-citrate synthase	208414	256612	255249	249867	215513	250765	240189	388978	391227		208414	249867	240189	256612	215513	388978	255249	250765	391227
Heat shock protein HSP 90-beta	233943	256040	165542	264605	287276	313839	385385	226952	228264		233943	264605	385385	256040	287276	226952	165542	313839	228264
T-complex protein 1 subunit zeta	391231	160569	279503	330538	164476	165863	285801	308563	261855		391231	330538	285801	160569	164476	308563	279503	165863	261855
Receptor of activated protein C kinase 1	125644	137512	136781	142638	283908	477168	510114	244774	276962		125644	142638	510114	137512	283908	244774	136781	477168	276962
Endoplasmin	163174	140637	173197	412122	333244	310202	253463	238567	285818		163174	412122	253463	140637	333244	238567	173197	310202	285818
Clathrin heavy chain 1	56100.3	56447.7	41372.1	357987	310300	359274	339362	381656	345476		56100.3	357987	339362	56447.7	310300	381656	41372.1	359274	345476
Alpha-actinin-1	55276.3	63018.2	47639.4	287079	428553	342131	341224	331560	319582		55276.3	287079	341224	63018.2	428553	331560	47639.4	342131	319582
Periostin	57049.2	42925.9	15526.5	363909	694148	669564	135596	97596.7	128836		57049.2	363909	135596	42925.9	694148	97596.7	15526.5	669564	128836
Collagen alpha-1(II) chain	676545	555336	368257	127573	126961	115228	78276.4	56340.4	63749.3		676545	127573	78276.4	555336	126961	56340.4	368257	115228	63749.3
Proteasome subunit alpha type-3	125644	137512	68390.6	167463	416649	168064	207639	448353	394576		125644	167463	207639	137512	416649	448353	68390.6	168064	394576
ADP/ATP translocase 2	128583	105546	115484	516090	373538	329601	152011	145882	247599		128583	516090	152011	105546	373538	145882	115484	329601	247599
14-3-3 protein theta	48645.3	55902.1	47661.6	245403	244226	410474	266660	288186	489126		48645.3	245403	266660	55902.1	244226	288186	47661.6	410474	489126
T-complex protein 1 subunit delta	282411	231814	230583	217628	278466	187209	192916	254565	209484		282411	217628	192916	231814	278466	254565	230583	187209	209484
4F2 cell-surface antigen heavy chain	58080.7	54485.8	74520	295397	320705	296458	285016	298391	379834		58080.7	295397	285016	54485.8	320705	298391	74520	296458	379834
Heat shock 70 kDa protein 1B	54123.6	49980.2	49714.7	317014	388300	342626	194999	333338	277917		54123.6	317014	194999	49980.2	388300	333338	49714.7	342626	277917
Heat shock 70 kDa protein 1A	54123.6	49980.2	49714.7	317014	388300	342626	194999	333338	277917		54123.6	317014	194999	49980.2	388300	333338	49714.7	342626	277917
Protein-glutamine gamma-glutamyltransferase 2	192357	236841	172761	242015	309670	242885	228918	192228	124289		192357	242015	228918	236841	309670	192228	172761	242885	124289
Glycogen phosphorylase	65237.2	76499.1	45655.7	287131	265343	308745	282642	257684	260879		65237.2	287131	282642	76499.1	265343	257684	45655.7	308745	260879
Pigment epithelium-derived factor	145373	149160	148368	247687	345099	198862	236733	204470	154239		145373	247687	236733	149160	345099	204470	148368	198862	154239
Tubulin beta-1 chain	67358.4	47391.9	54996.8	251937	292225	252590	308890	250118	283009		67358.4	251937	308890	47391.9	292225	250118	54996.8	252590	283009
Integrin beta-1	158947	130470	151407	129797	161792	130524	280380	230636	293586		158947	129797	280380	130470	161792	230636	151407	130524	293586
40S ribosomal protein S3	41750.2	34270.3	45451	315973	157229	105703	235159	372368	344730		41750.2	315973	235159	34270.3	157229	372368	45451	105703	344730
Glycogen phosphorylase	56393	63648.3	28777.4	197728	240508	176390	291894	280126	264136		56393	197728	291894	63648.3	240508	280126	28777.4	176390	264136
Alpha-actinin-4	63516.4	61337.5	36607	217959	333713	252394	234431	168735	203652		63516.4	217959	234431	61337.5	333713	168735	36607	252394	203652
RuvB-like 1	49134.5	45373.1	30088.1	161507	200916	243132	355258	227290	257179		49134.5	161507	355258	45373.1	200916	227290	30088.1	243132	257179
Proteasome subunit beta type-5	97723.1	112301	15941.9	6678.81	453189	253894	215330	232479	175367		97723.1	6678.81	215330	112301	453189	232479	15941.9	253894	175367
Erythrocyte band 7 integral membrane protein	74534.6	91771.6	152140	278284	207712	139642	116284	169427	287561		74534.6	278284	116284	91771.6	207712	169427	152140	139642	287561
Neutral alpha-glucosidase AB	78655.2	88041	87573.4	298116	339070	192335	85223.8	122682	190870		78655.2	298116	85223.8	88041	339070	122682	87573.4	192335	190870
Calnexin	165945	136214	169364	166318	275867	278193	97701.3	70251.4	119354		165945	166318	97701.3	136214	275867	70251.4	169364	278193	119354
Cytoplasmic dynein 1 heavy chain 1	189964	155930	214757	99442.7	106883	99800	175305	230275	185602		189964	99442.7	175305	155930	106883	230275	214757	99800	185602
T-complex protein 1 subunit alpha	52791.6	30333.5	38793	185927	246714	217695	147983	213025	265142		52791.6	185927	147983	30333.5	246714	213025	38793	217695	265142
Voltage-dependent anion-selective channel protein 1	113729	108913	123811	163132	270582	272863	112279	121221	91441.5		113729	163132	112279	108913	270582	121221	123811	272863	91441.5
Peroxiredoxin-4	75448	79625.3	44001.3	163759	325948	218911	240189	129530	97806.7		75448	163759	240189	79625.3	325948	129530	44001.3	218911	97806.7
Eukaryotic translation initiation factor 3 subunit B	141856	145552	57911.4	85069.7	84661.8	142292	182712	281806	212576		141856	85069.7	182712	145552	84661.8	281806	57911.4	142292	212576
Vimentin	107292	58713.4	116803	198960	330009	299512	65415.3	47036.4	88791.8		107292	198960	65415.3	58713.4	330009	47036.4	116803	299512	88791.8
Glycine--tRNA ligase	169136	208251	138096	54325.2	162194	136301	210106	134424	95062.9		169136	54325.2	210106	208251	162194	134424	138096	136301	95062.9
26S proteasome regulatory subunit 7	41981.3	77534.9	102831	198728	98887.3	99720.8	217362	178799	252889		41981.3	198728	217362	77534.9	98887.3	178799	102831	99720.8	252889
Talin-1	167402	199870	186382	187566	155555	149023	65889.2	84310.4	65585.7		167402	187566	65889.2	199870	155555	84310.4	186382	149023	65585.7
UDP-glucose 6-dehydrogenase	128404	131749	131050	98673	163666	198055	132093	166382	80683.7		128404	98673	132093	131749	163666	166382	131050	198055	80683.7
Importin subunit beta-1	89484.8	62959.6	31312.6	196338	167483	225193	135095	136131	176037		89484.8	196338	135095	62959.6	167483	136131	31312.6	225193	176037
X-ray repair cross-complementing protein 5	132768	54490.9	81302.2	135006	134358	237109	139353	160482	136189		132768	135006	139353	54490.9	134358	160482	81302.2	237109	136189
Proteasome subunit alpha type-4	65743.9	53965.3	17892.9	150583	149861	226686	227203	163532	123358		65743.9	150583	227203	53965.3	149861	163532	17892.9	226686	123358
26S proteasome regulatory subunit 6A	54290.6	59418.6	29551.5	182834	90978.5	183491	186967	157000	228402		54290.6	182834	186967	59418.6	90978.5	157000	29551.5	183491	228402
ATP-dependent RNA helicase A	219877	252678	71810.2	75291.6	104903	75562.1	118634	128083	108695		219877	75291.6	118634	252678	104903	128083	71810.2	75562.1	108695
T-complex protein 1 subunit beta	68926.9	50920.3	45022.1	149710	89395	150247	139025	240155	181158		68926.9	149710	139025	50920.3	89395	240155	45022.1	150247	181158
Cullin-associated NEDD8-dissociated protein 1	53642	55039.4	27373.6	150583	149861	151124	192884	151451	171368		53642	150583	192884	55039.4	149861	151451	27373.6	151124	171368
26S proteasome non-ATPase regulatory subunit 6	61647.7	50603	50334.2	123771	123178	165622	156150	140488	158963		61647.7	123771	156150	50603	123178	140488	50334.2	165622	158963
Nicotinamide phosphoribosyltransferase	101482	83300.3	82857.9	71229.4	212664	142971	95502.8	91652.4	129631		101482	71229.4	95502.8	83300.3	212664	91652.4	82857.9	142971	129631
Actin-related protein 2/3 complex subunit 2	115731	126662	62994.7	113996	170174	114405	128299	92345.1	69659.2		115731	113996	128299	126662	170174	92345.1	62994.7	114405	69659.2
Coagulation factor V	70249.3	38442.3	38238.2	128697	185005	172213	140516	121366	91550.5		70249.3	128697	140516	38442.3	185005	121366	38238.2	172213	91550.5
Dolichyl-diphosphooligosaccharide--protein glycosyltransferase subunit 2	78178.5	64172.1	95746.9	176523	140541	177157	105892	50811.3	86239.7		78178.5	176523	105892	64172.1	140541	50811.3	95746.9	177157	86239.7
Prolow-density lipoprotein receptor-related protein 1	77762	113476	91709.6	76981.9	106407	60089.9	120504	164795	161931		77762	76981.9	120504	113476	106407	164795	91709.6	60089.9	161931
ATP-dependent 6-phosphofructokinase	56620.7	30953.4	46229.7	94827.1	125830	95167.9	174369	167339	142009		56620.7	94827.1	174369	30953.4	125830	167339	46229.7	95167.9	142009
Sodium/potassium-transporting ATPase subunit alpha-1	67398.1	96815.4	68786.6	161278	100315	80928.7	124754	89793.5	25569.7		67398.1	161278	124754	96815.4	100315	89793.5	68786.6	80928.7	25569.7
RuvB-like 2	40221.4	44020.5	32840	69999.8	104496	70181.1	150246	129770	171307		40221.4	69999.8	150246	44020.5	104496	129770	32840	70181.1	171307
Cation-independent mannose-6-phosphate receptor	151660	160057	159207	61648.9	43823.8	35354.5	58440	50475.5	57113.2		151660	61648.9	58440	160057	43823.8	50475.5	159207	35354.5	57113.2
Bifunctional purine biosynthesis protein PURH	87600.4	28762.4	28609.6	119970	119395	72240.7	52126.6	131316	127358		87600.4	119970	52126.6	28762.4	119395	131316	28609.6	72240.7	127358
ERO1-like protein alpha	75965.2	41570.2	62024.1	81800.9	122113	164190	85223.8	61340.9	69407.4		75965.2	81800.9	85223.8	41570.2	122113	61340.9	62024.1	164190	69407.4
Filamin-B	54613.5	42880	32958.5	85934.8	98680	66341.2	81319.8	121564	147739		54613.5	85934.8	81319.8	42880	98680	121564	32958.5	66341.2	147739
AP-1 complex subunit beta-1	50336	18780.9	11208.7	88289	153765	110758	87490.1	110201	26506.2		50336	88289	87490.1	18780.9	153765	110201	11208.7	110758	26506.2
Vinculin	190283	104128	103575	32164.2	48015	48419.7	25797.1	27851.7	21009.5		190283	32164.2	25797.1	104128	48015	27851.7	103575	48419.7	21009.5
Sulfhydryl oxidase 1	125133	44020.5	43786.7	37546.2	74732.3	37681.1	103053	44504.3	67142.3		125133	37546.2	103053	44020.5	74732.3	44504.3	43786.7	37681.1	67142.3
Coatomer subunit alpha	74547.2	61191.4	30372.3	26441.5	39472	39804.7	61110.8	109963	87096.5		74547.2	26441.5	61110.8	61191.4	39472	109963	30372.3	39804.7	87096.5
Collagen alpha-1(VI) chain	49523	27100.3	33695.5	89036.8	88609.8	107228	74030.1	26642	30145.5		49523	89036.8	74030.1	27100.3	88609.8	26642	33695.5	107228	30145.5
Collagen alpha-3(VI) chain	48749.2	43093.4	30617.5	47545.9	47317.9	53018.6	49300.1	35484.3	48180.8		48749.2	47545.9	49300.1	43093.4	47317.9	35484.3	30617.5	53018.6	48180.8
